# Supplementary material for: Are patients with hypermobile Ehlers–Danlos syndrome or hypermobility spectrum disorder so different?
Source: Springer Nature journal article supplement (doi:10.1007/s00296-021-04968-3), 2021-08-16

## hEDS

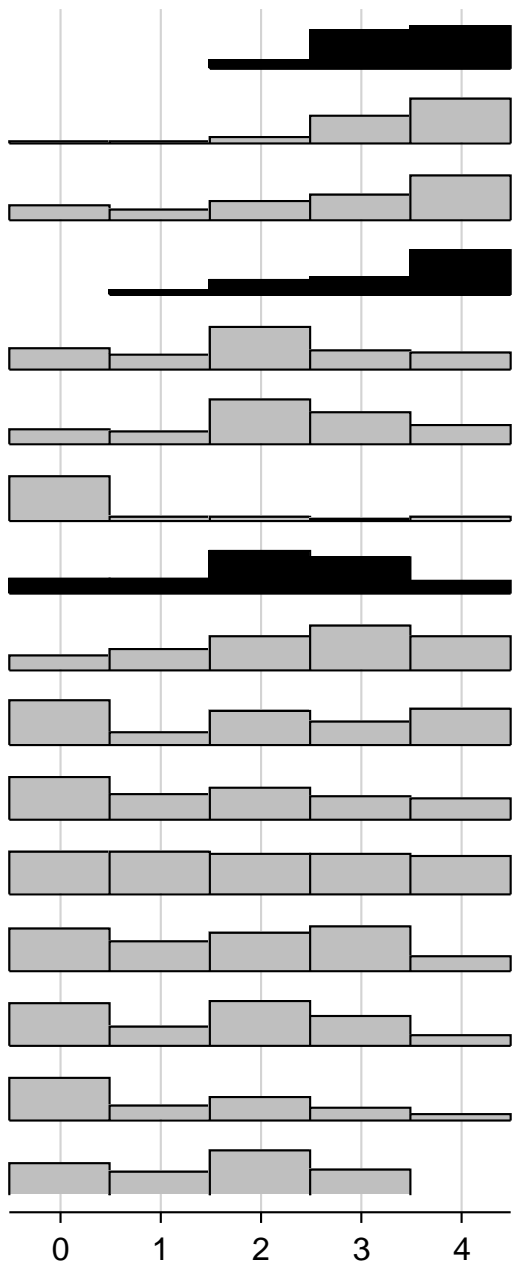

## HSD

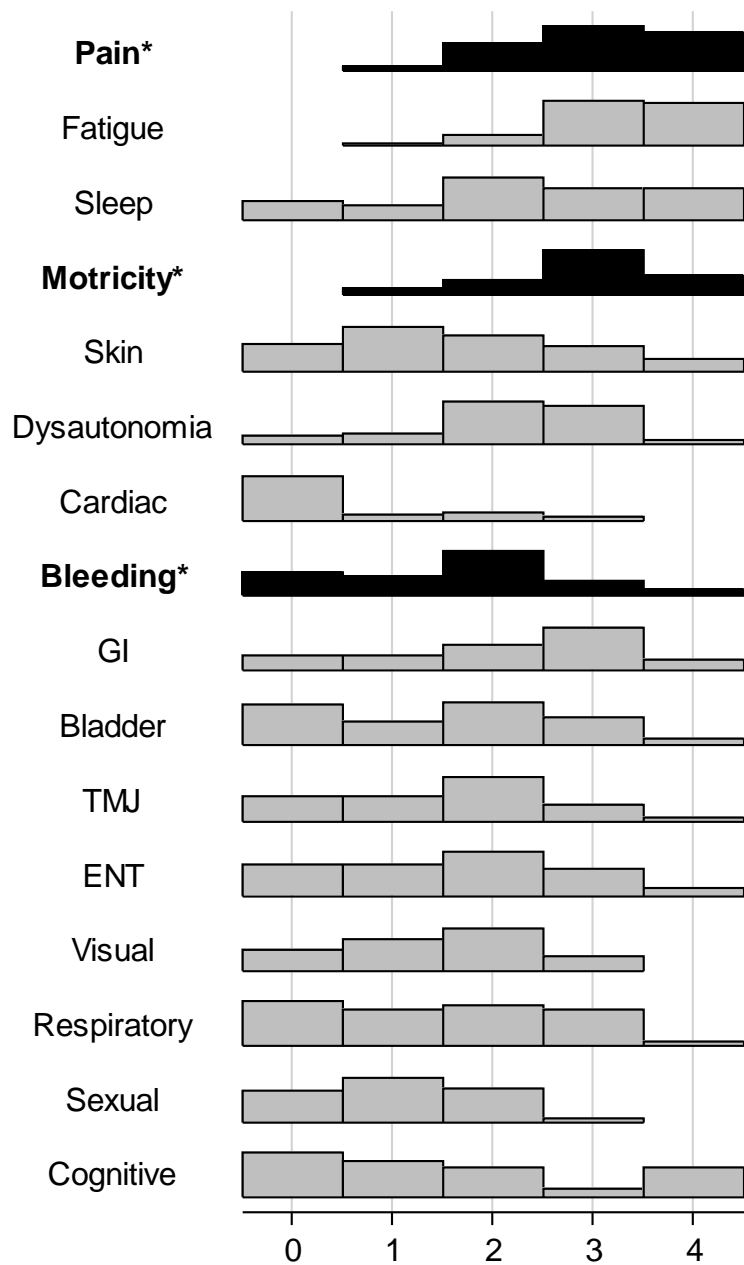

Supplement: MOESM1 [file 19573654]
